# Supplementary material for: p57 Suppresses the Pluripotency and Proliferation of Mouse Embryonic Stem Cells by Positively Regulating p53 Activation
Source: Hindawi journal article supplement (doi:10.1155/2021/4968649), 2021-12-24

Supplementary Figure 1

A

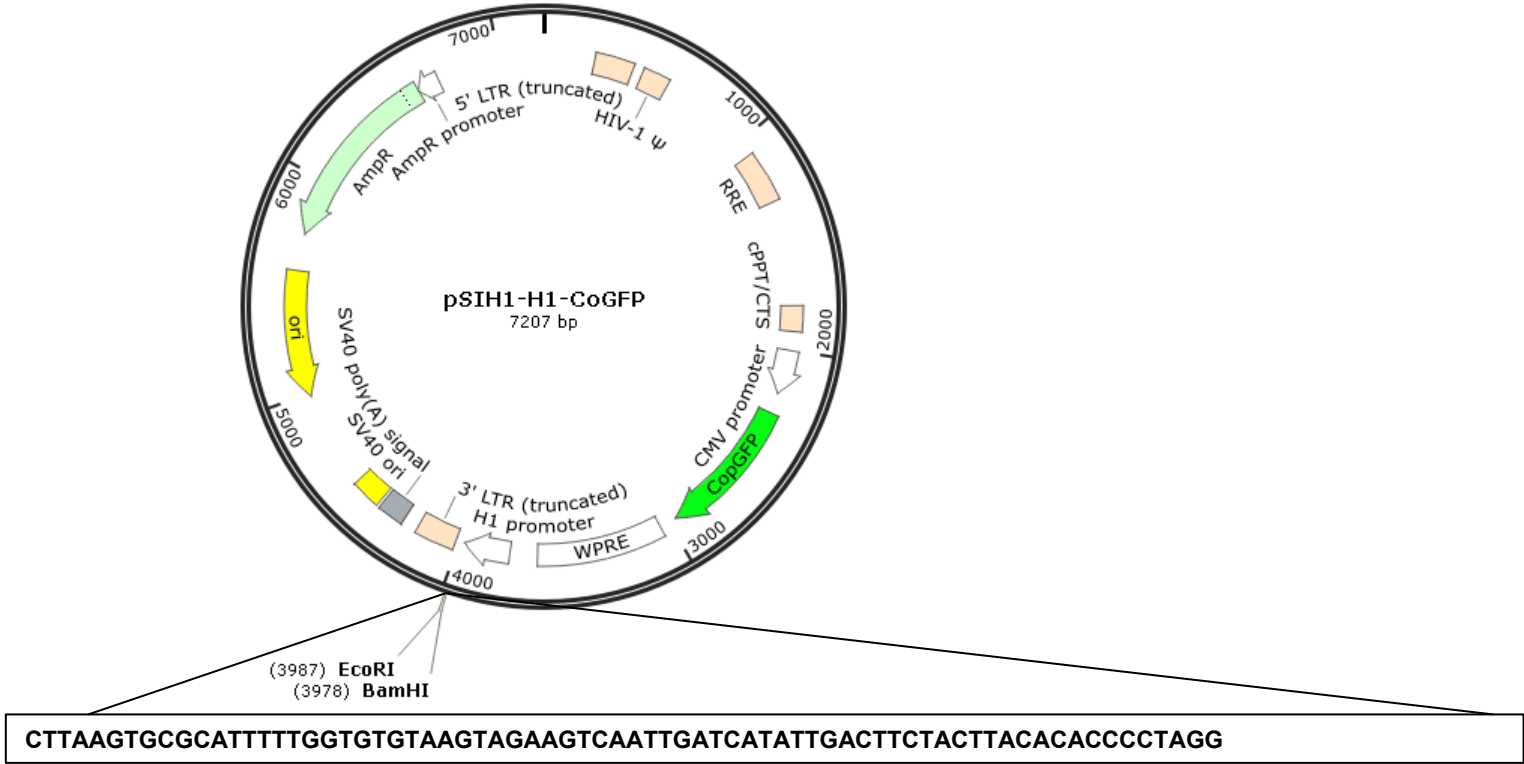

B

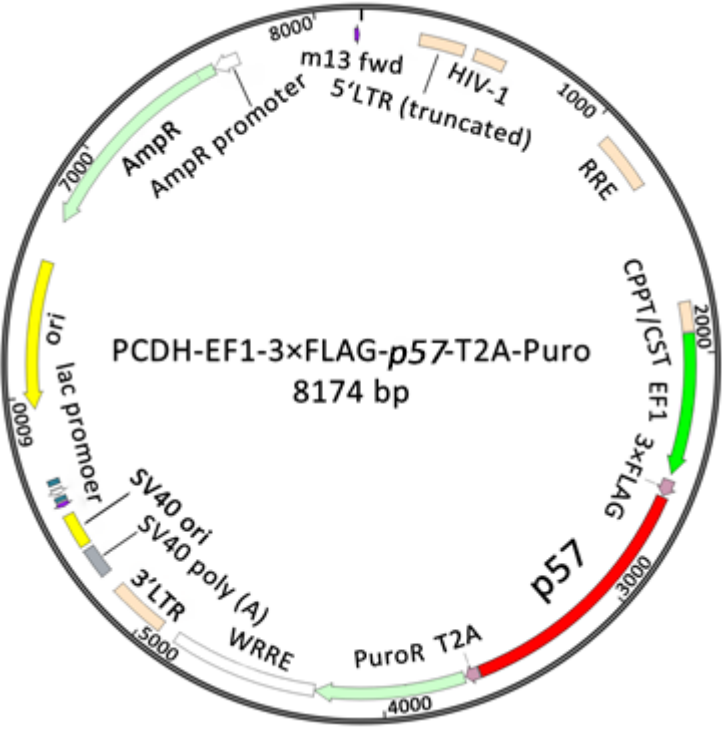

C

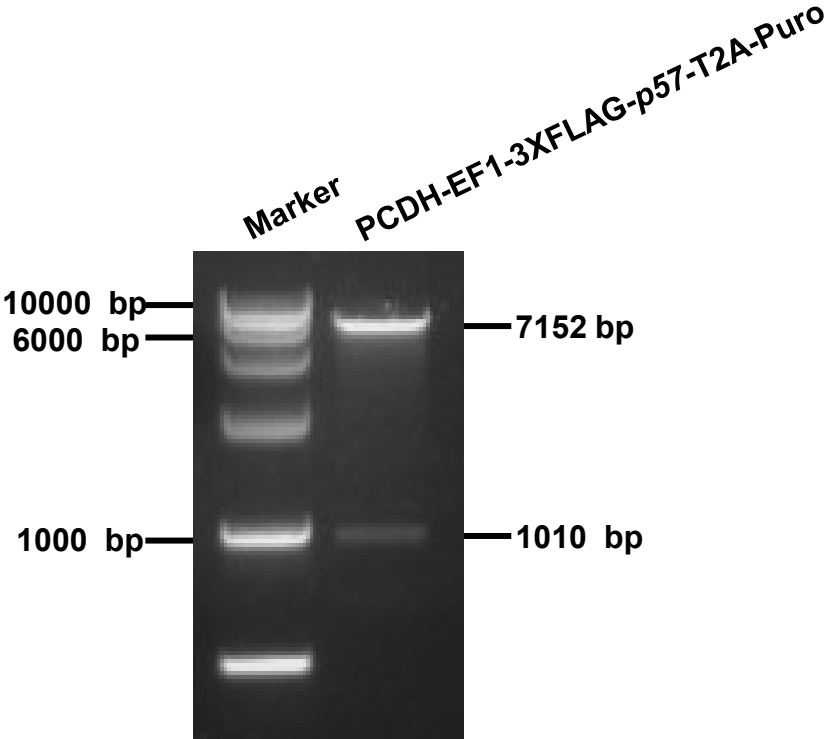

Supplementary Figure 2

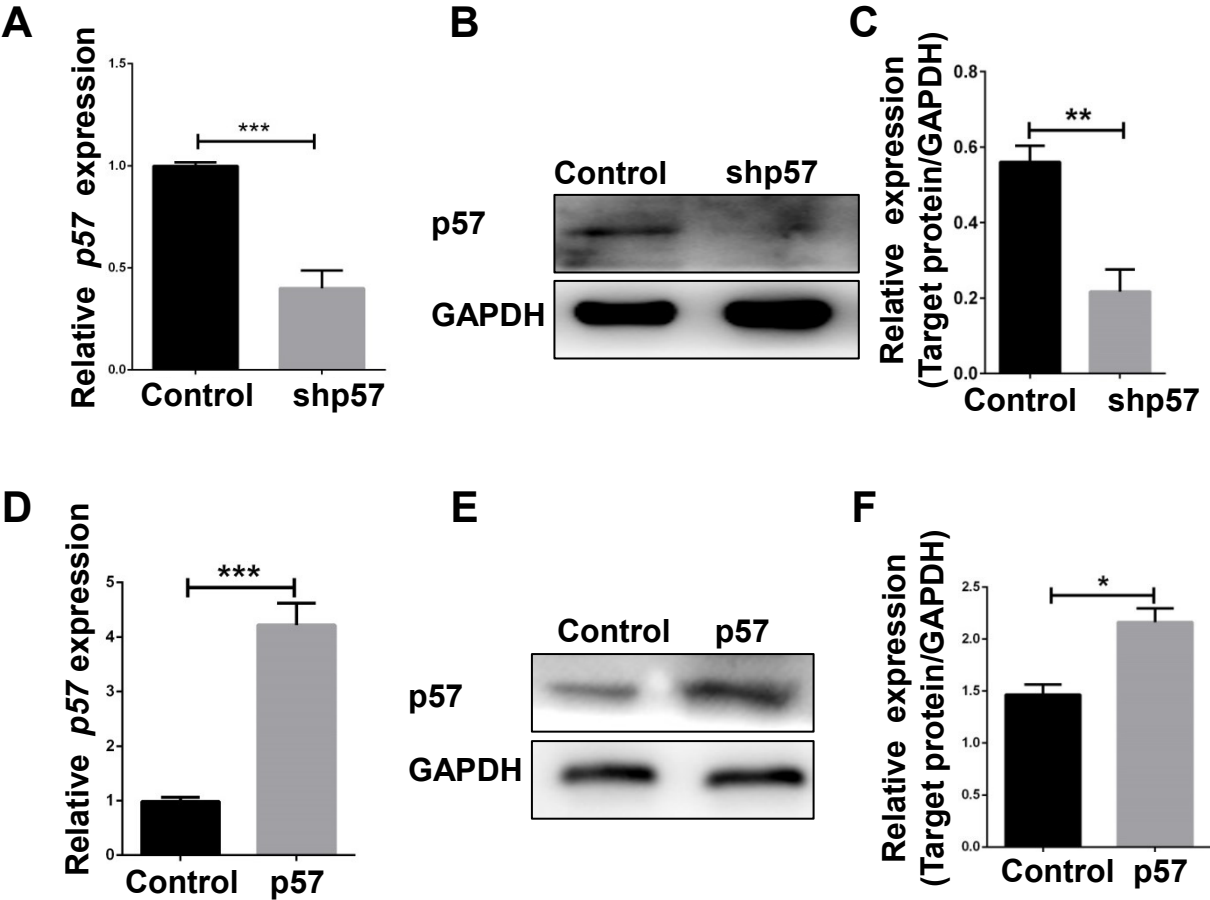

Supplementary Figure 3

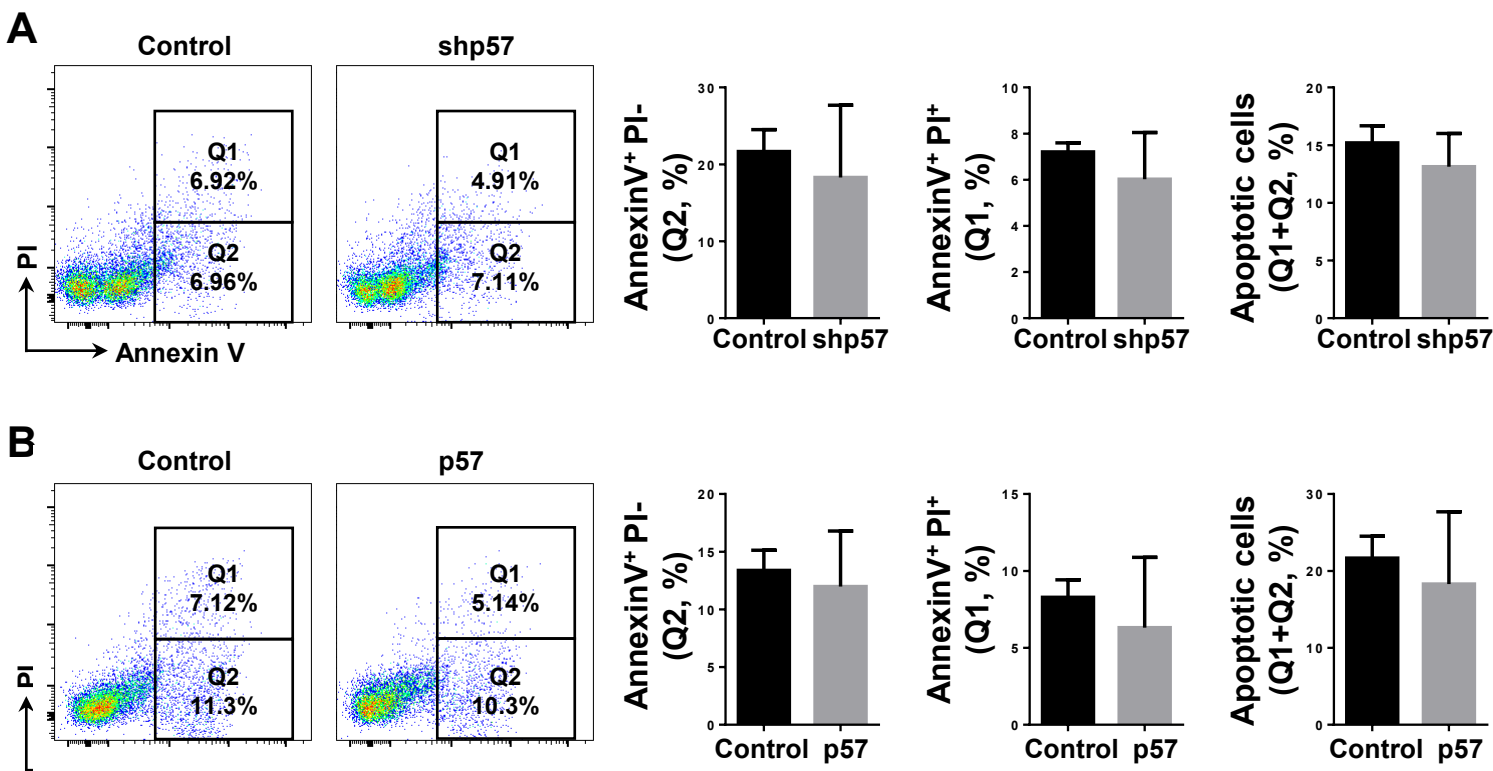

Supplementary Figure 4

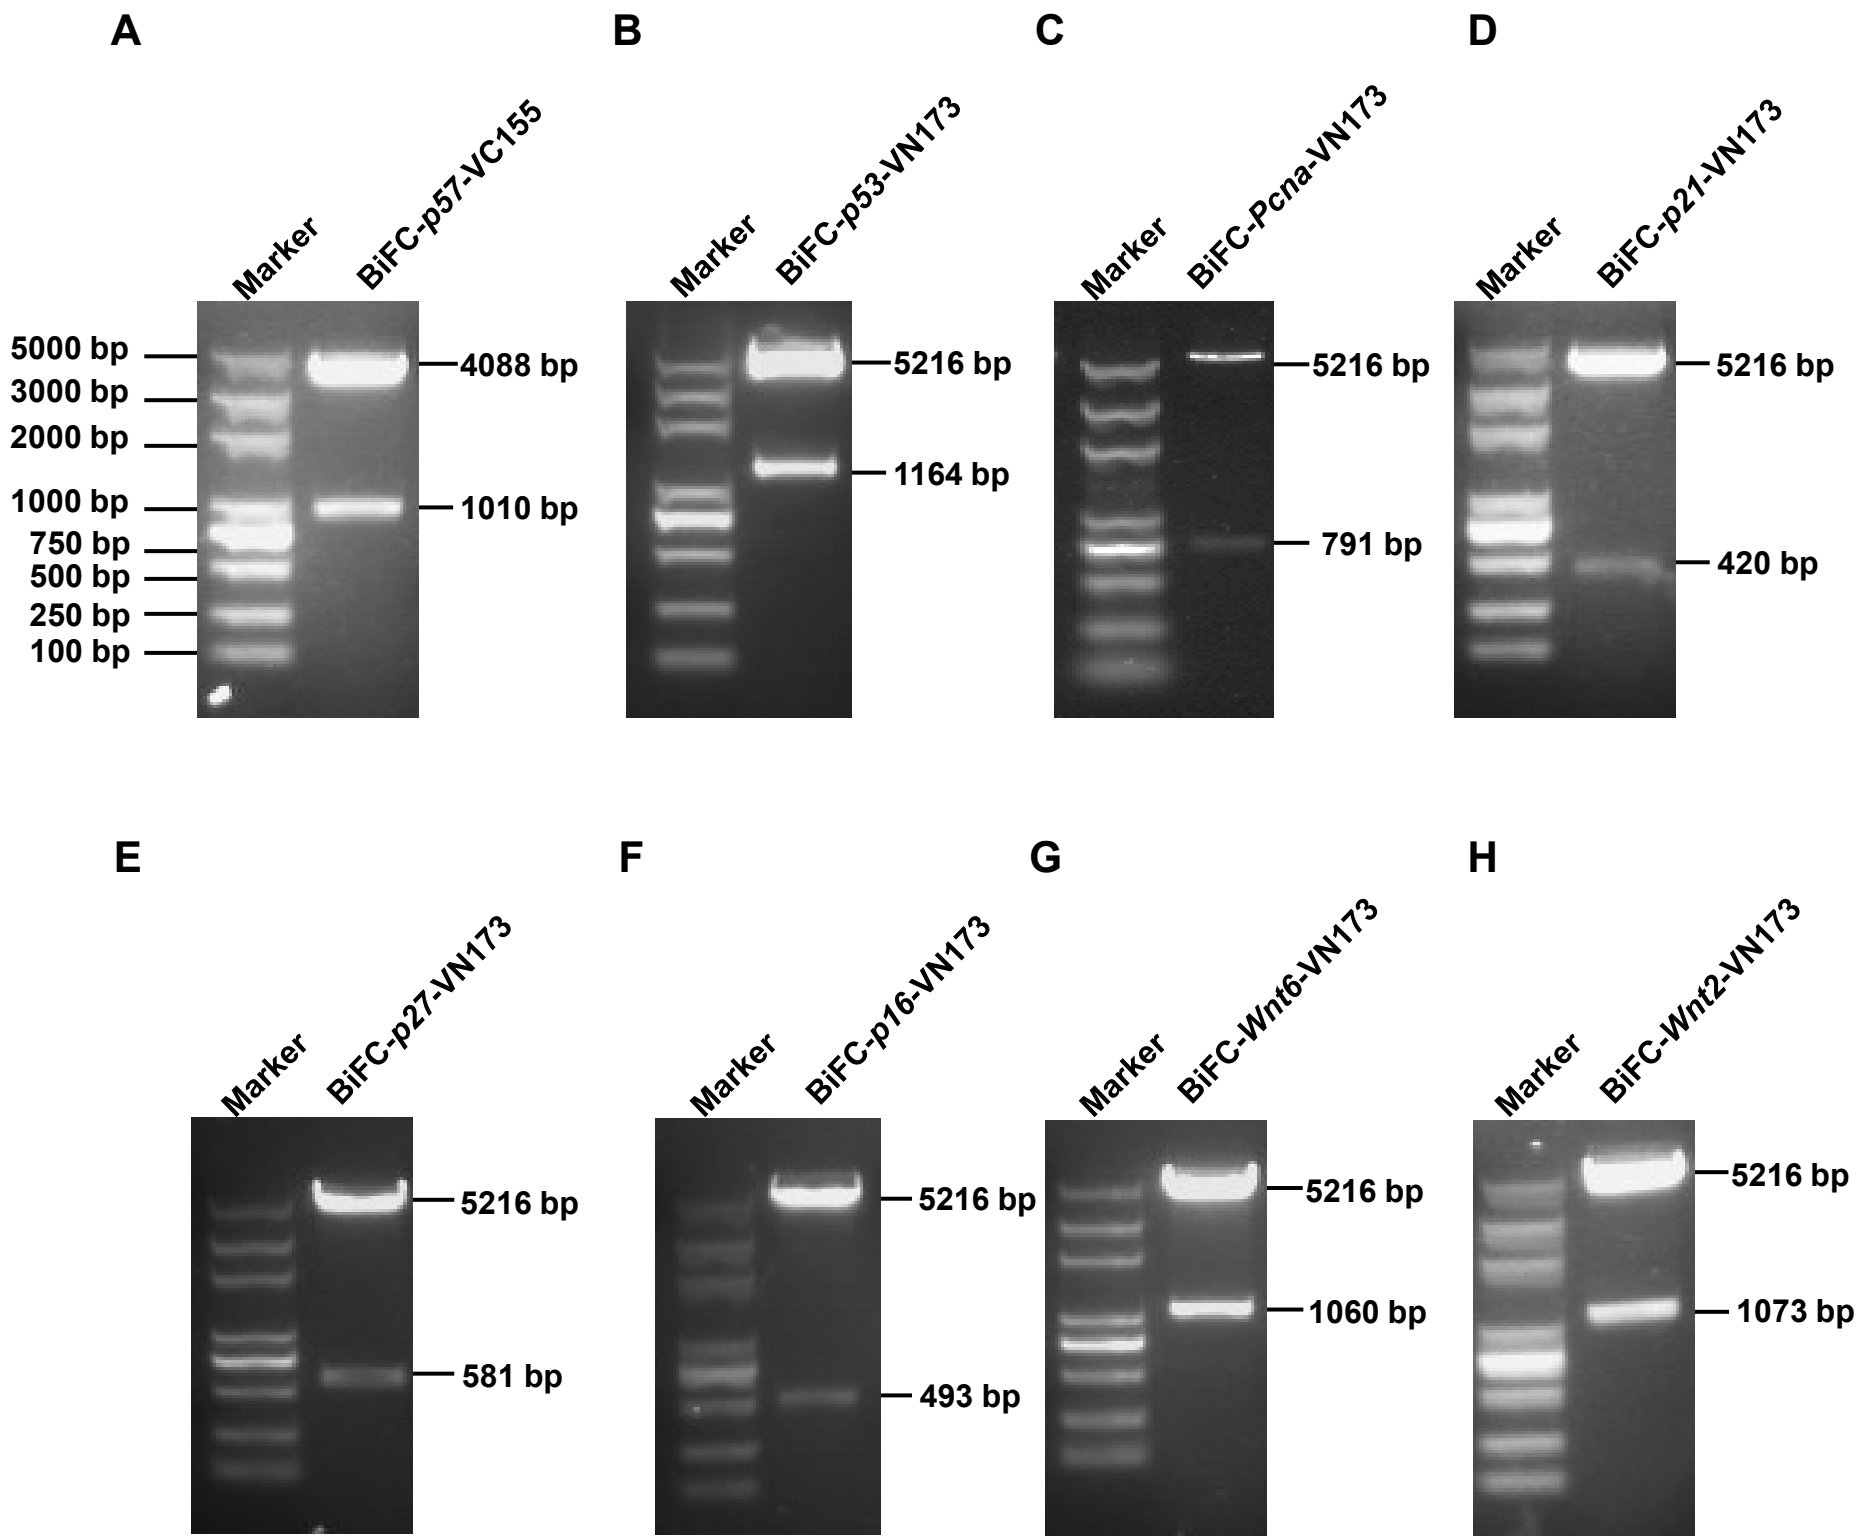

Supplementary Figure 5

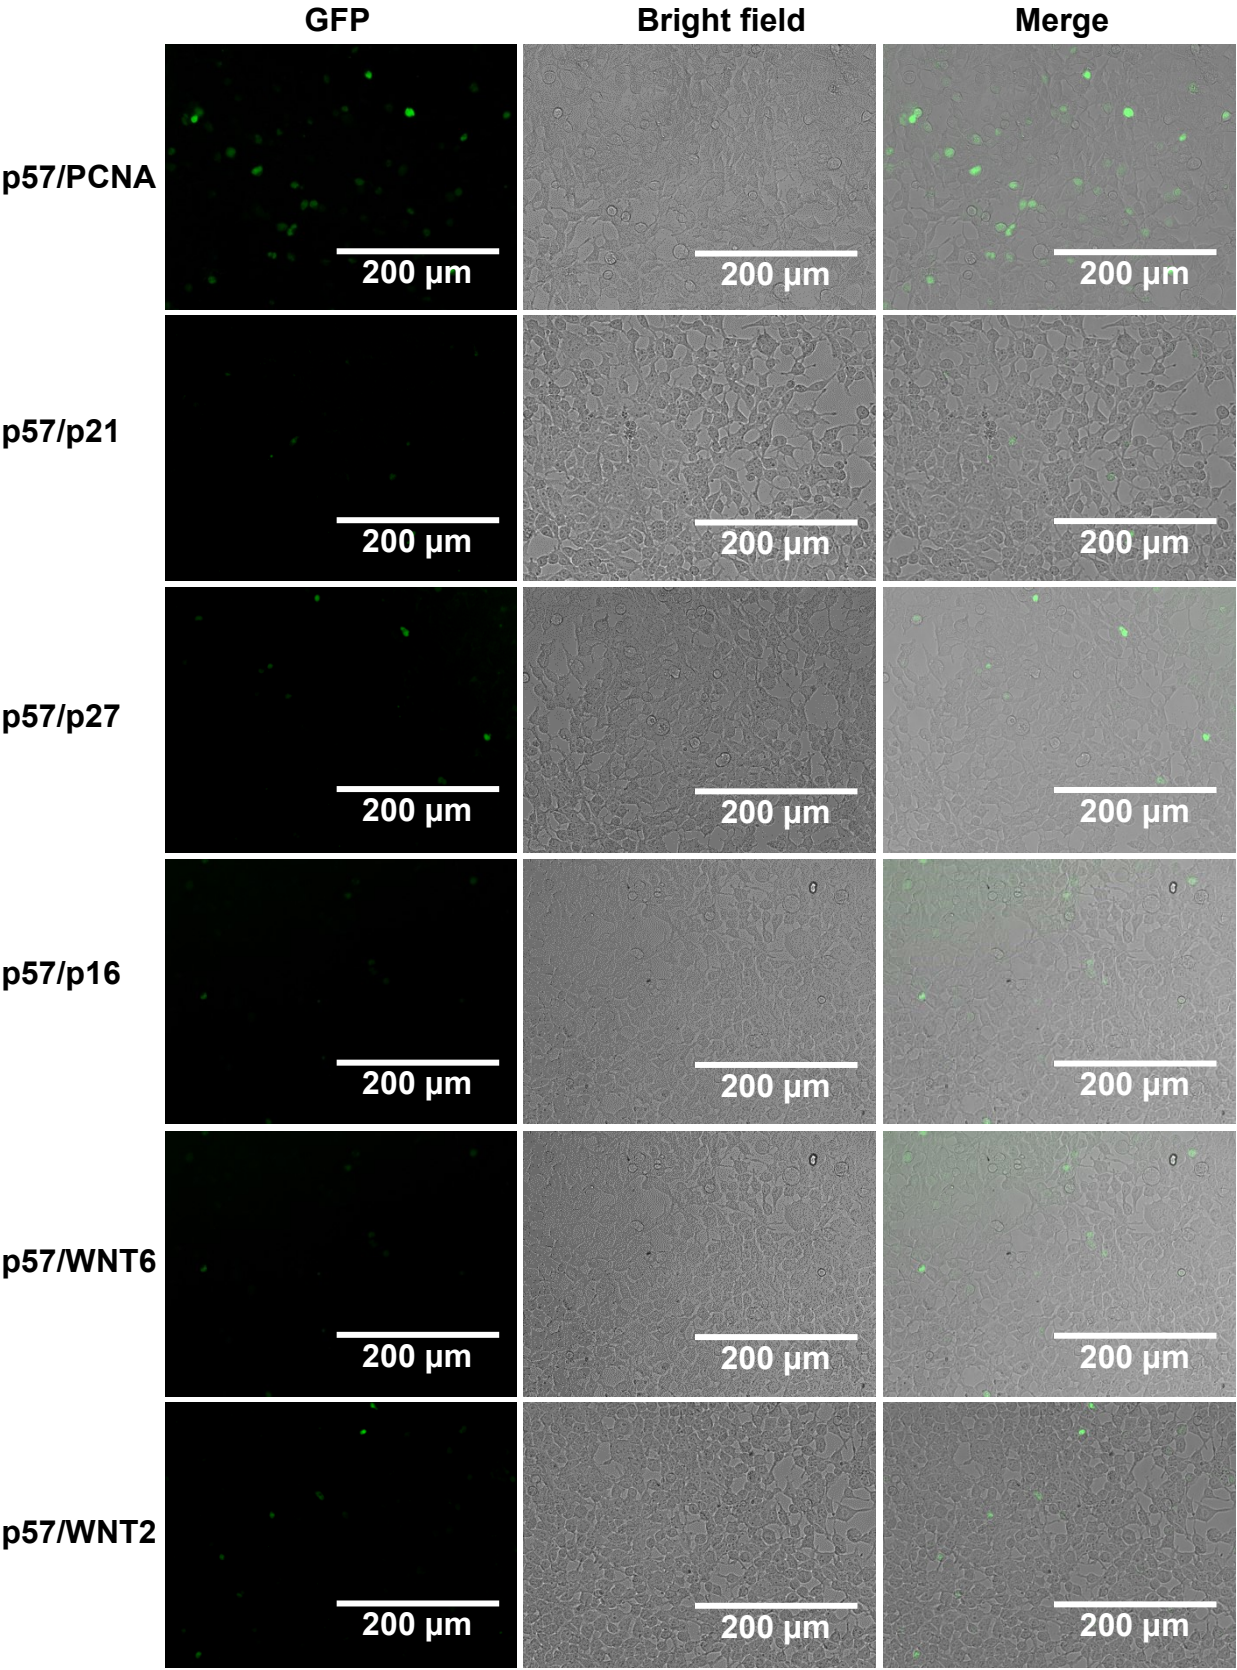

Supplementary Figure 6

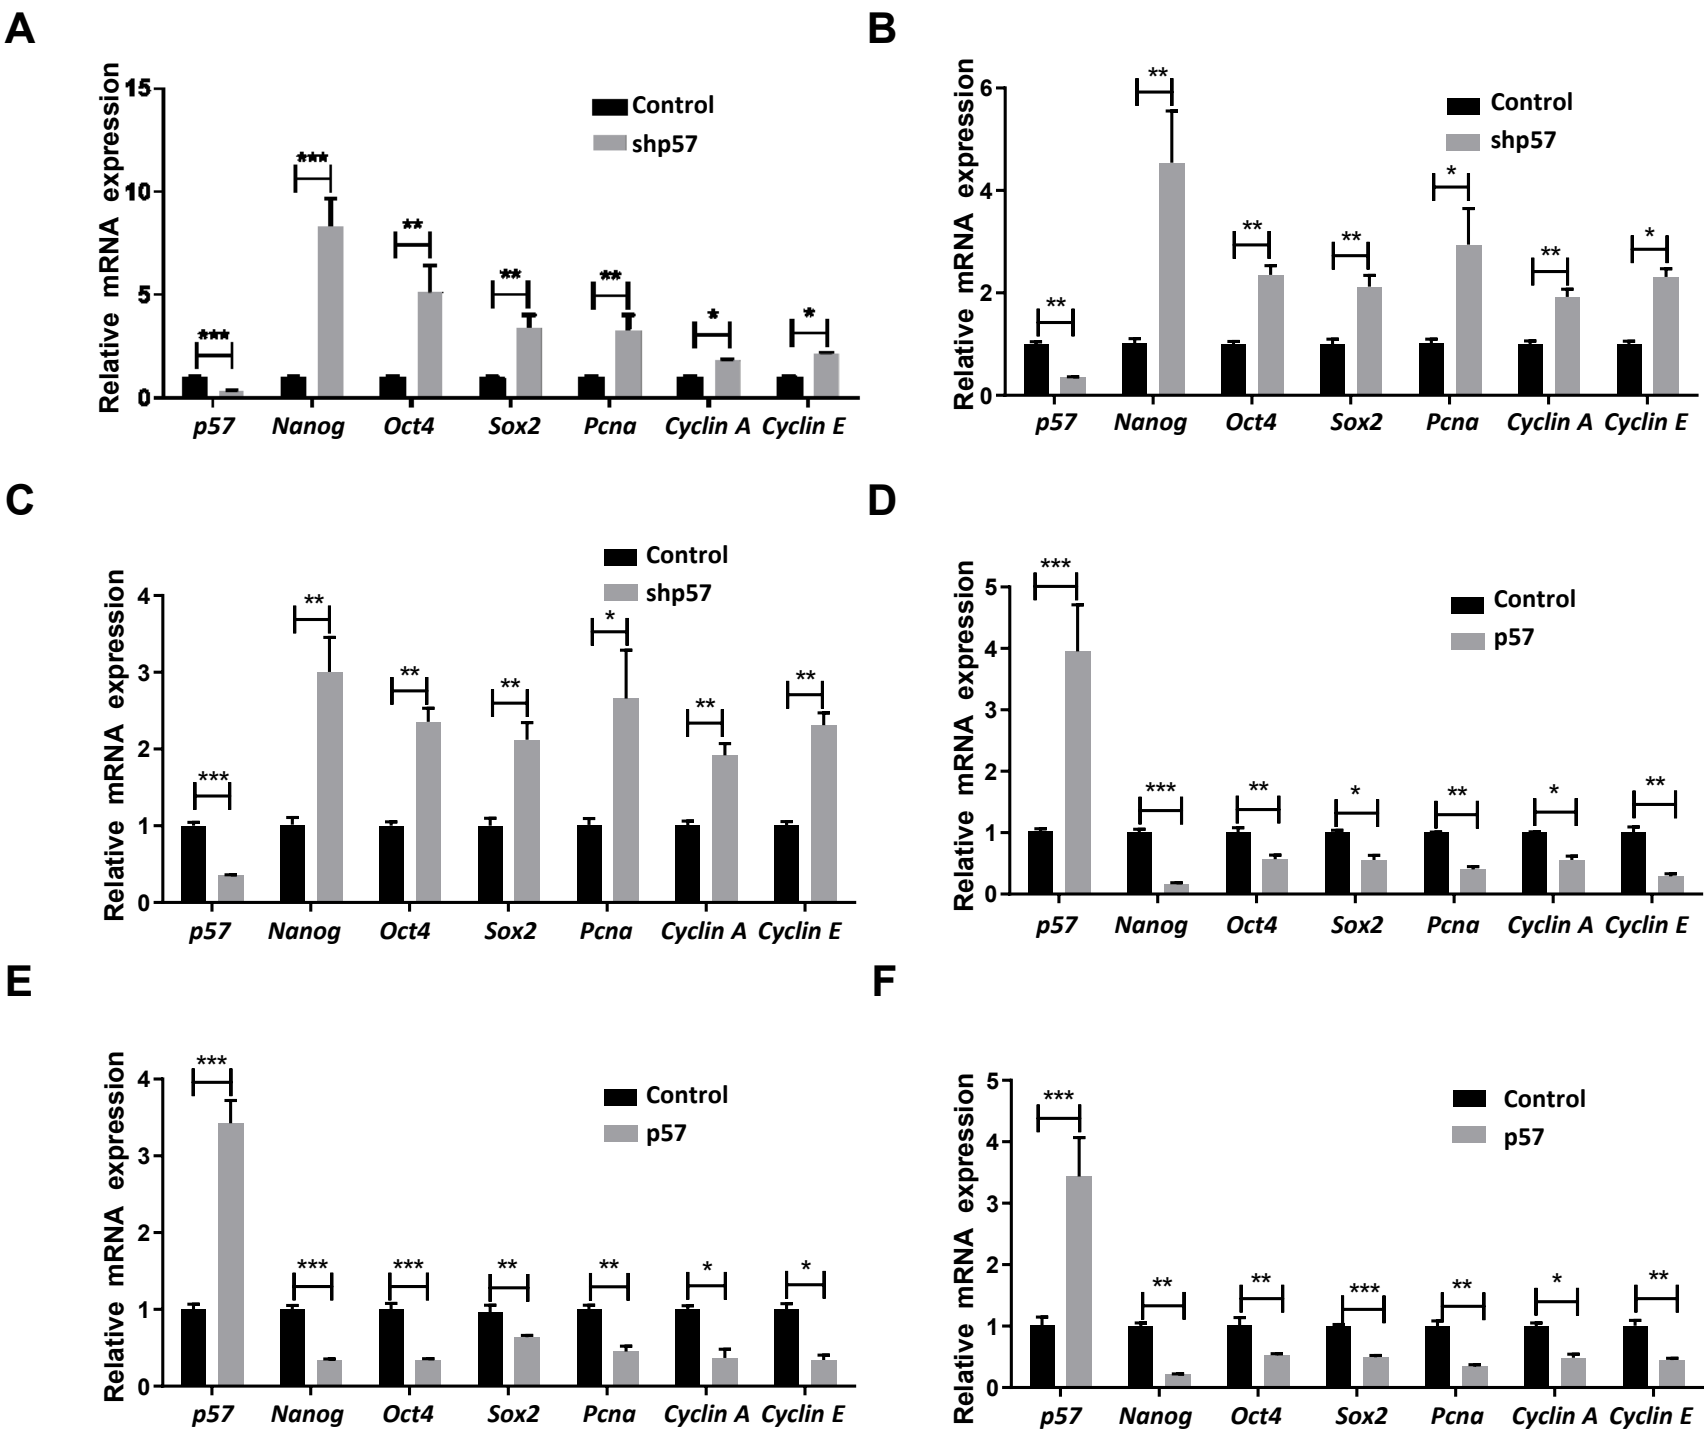

Supplementary Figure 7

A

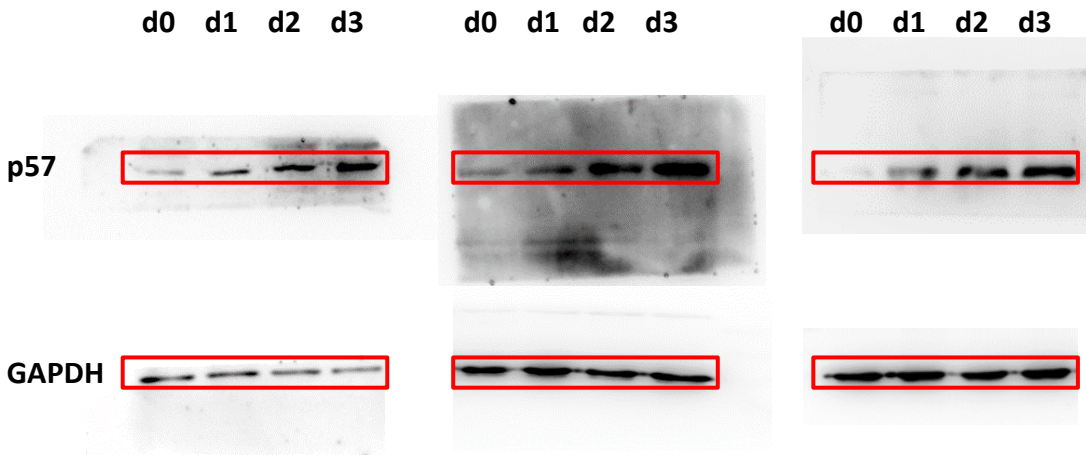

B

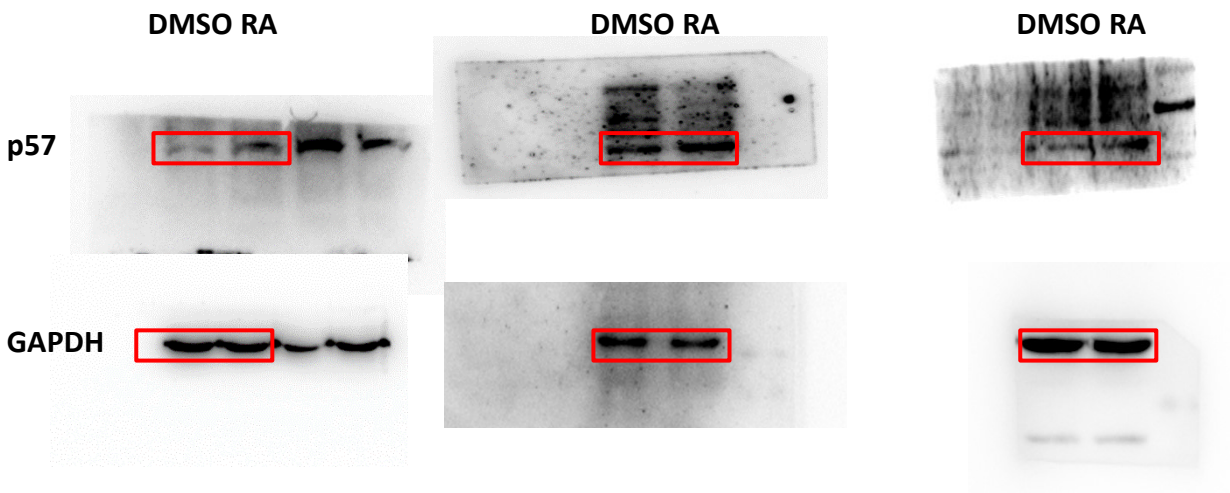



Supplementary Figure 8

A

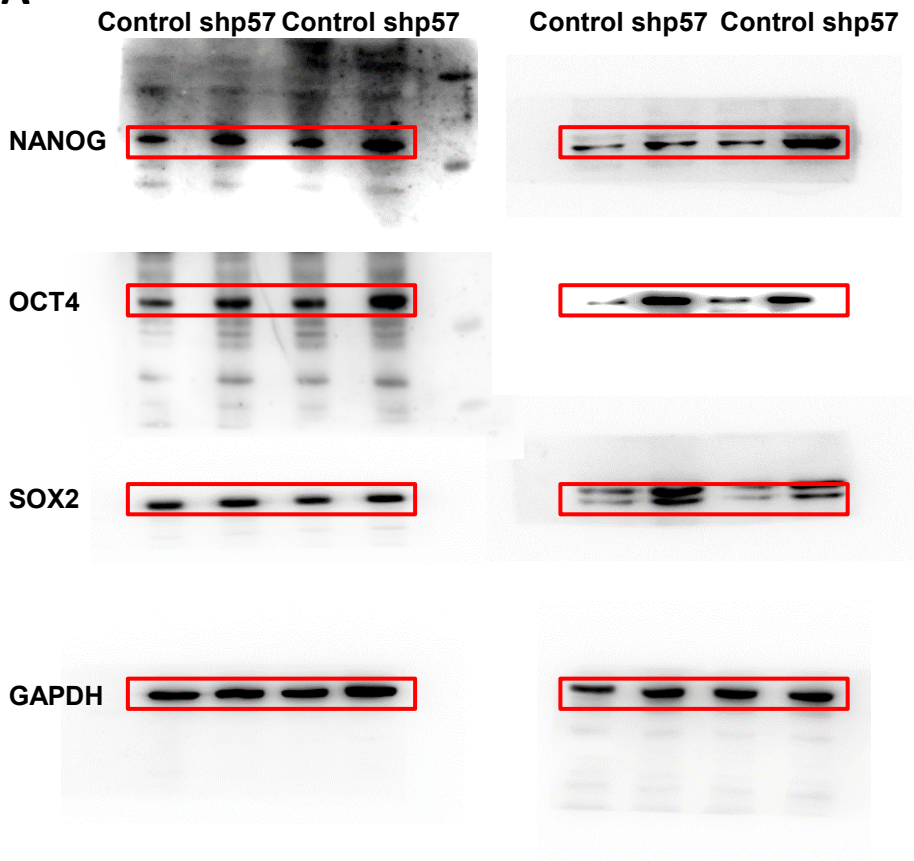

B

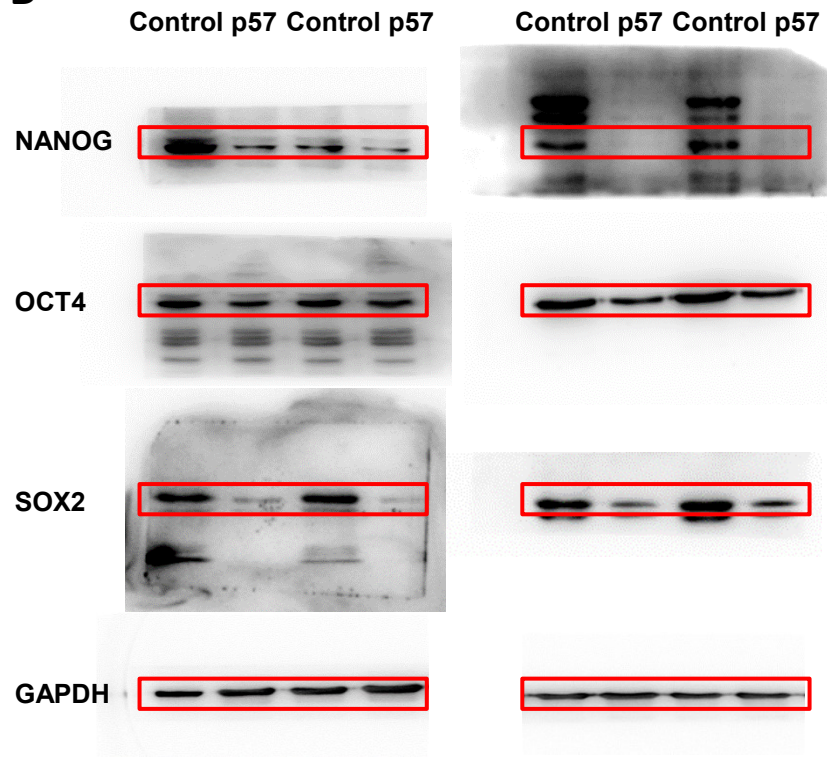



Supplementary Figure 9

A

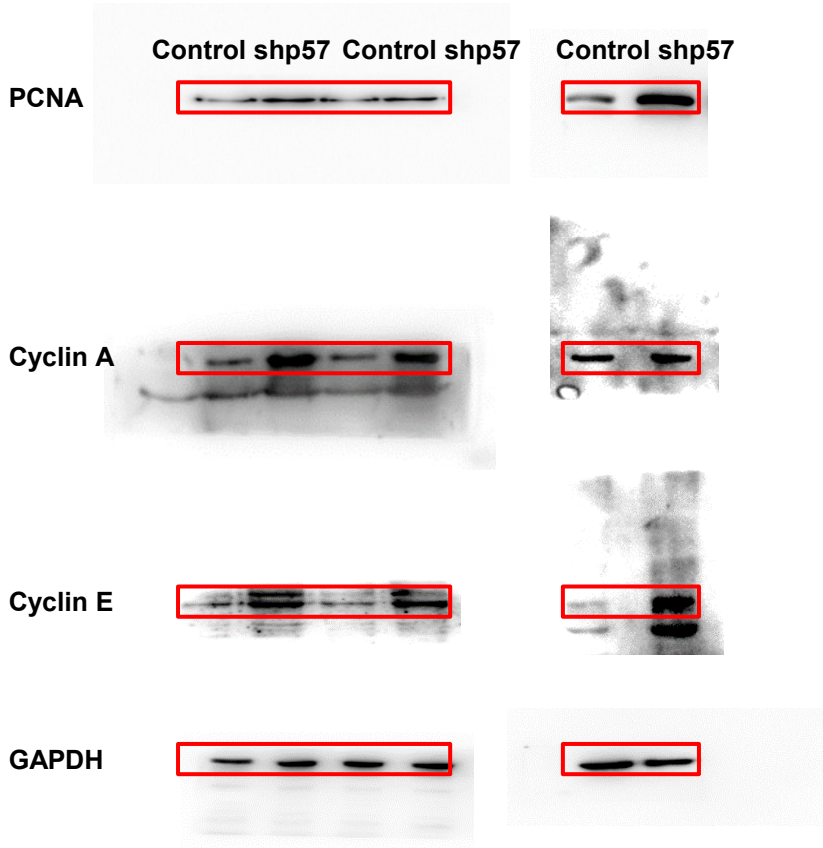

B

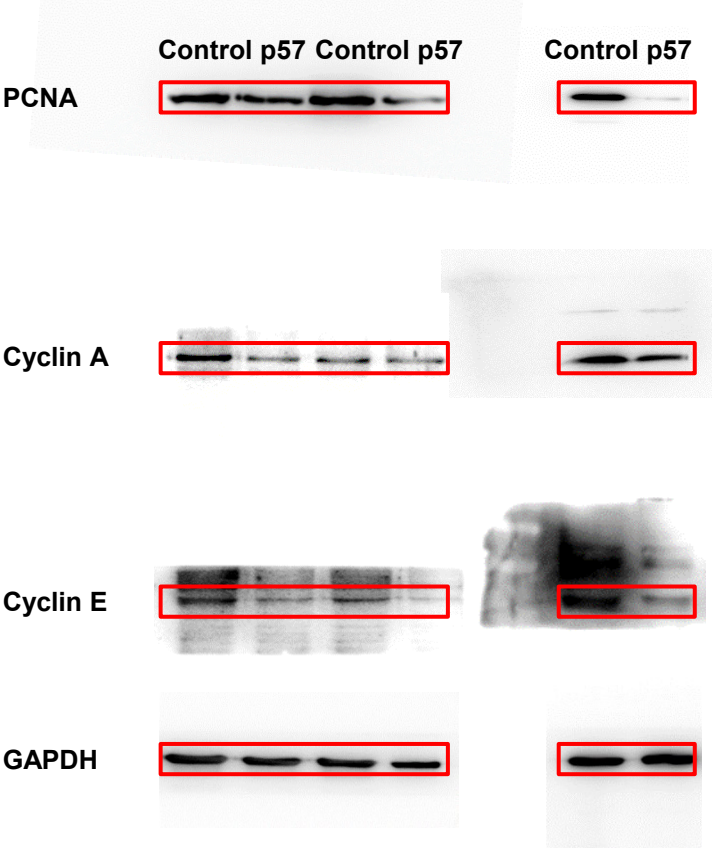

Supplementary Figure 10

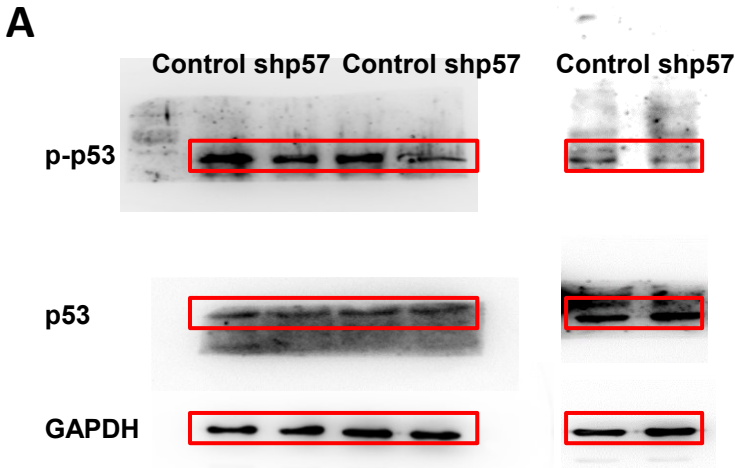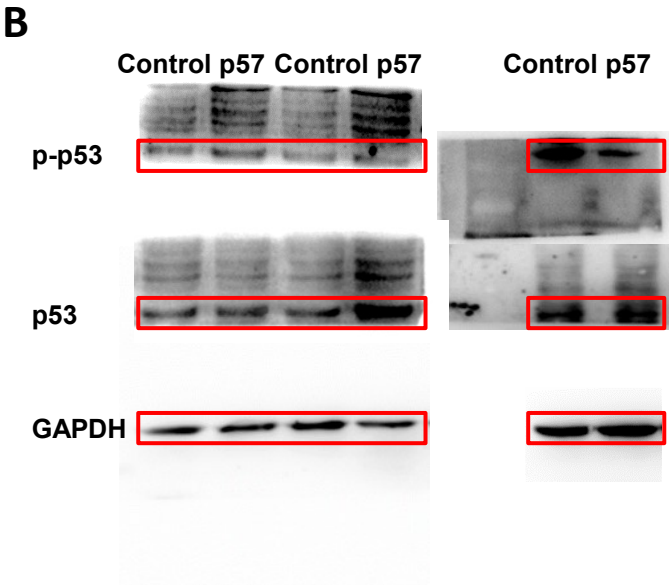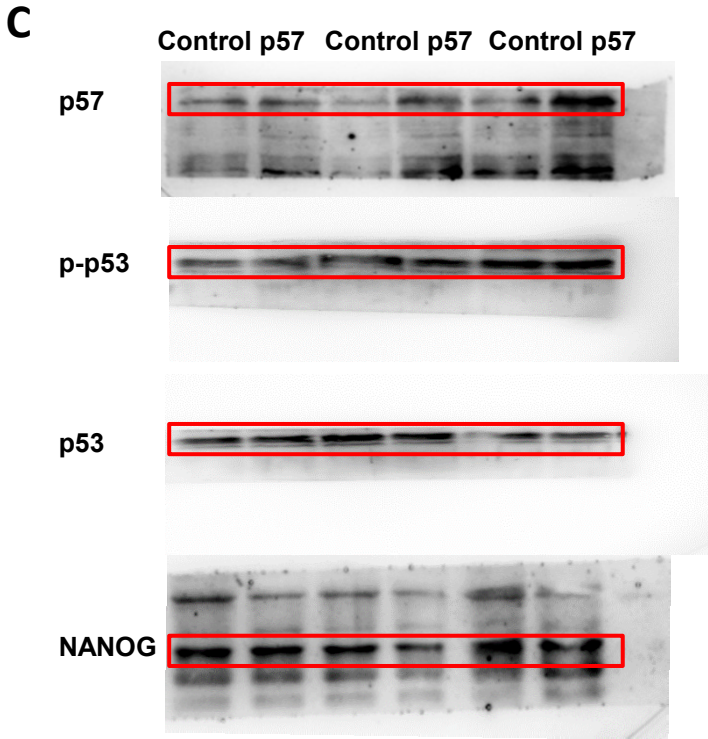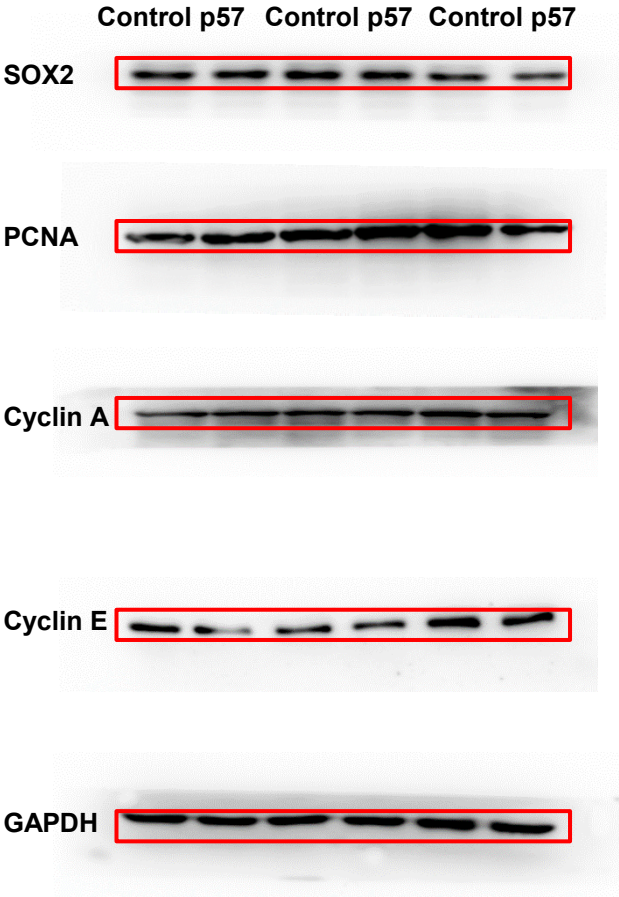

# Supplementary Figure 11

A

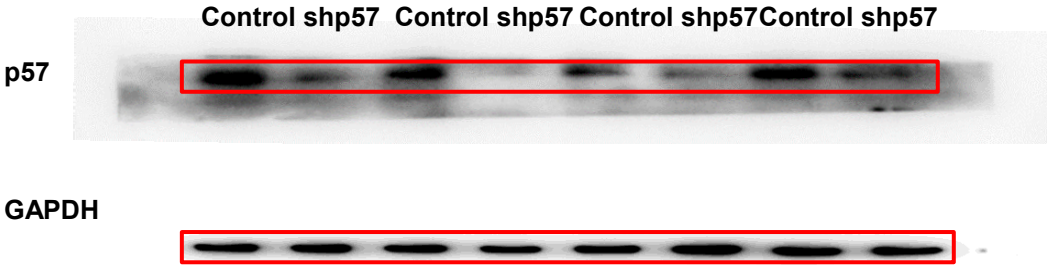

B

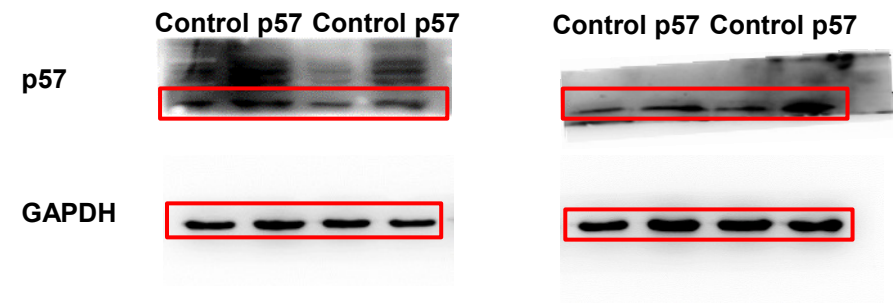

Supplement: f1 [file 4968649.f1.zip]
